# Supplementary material for: Diallyl Trisulfide Induces ROS-Mediated Mitotic Arrest and Apoptosis and Inhibits HNSCC Tumor Growth and Cancer Stemness
Source: MDPI journal article supplement (doi:10.3390/cancers16020378), 2024-01-16

Figure 1I

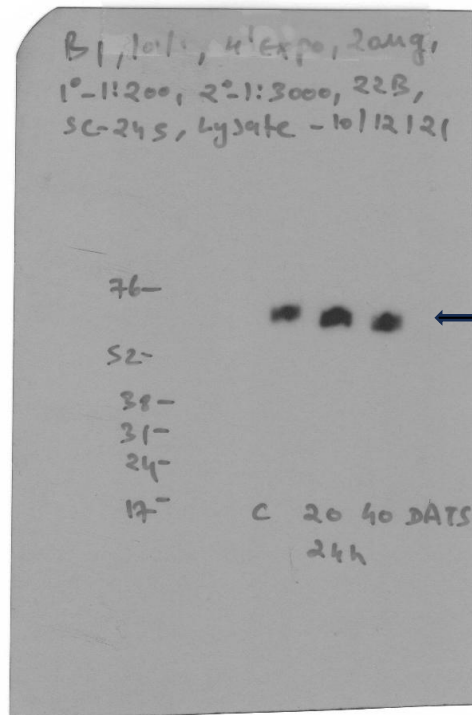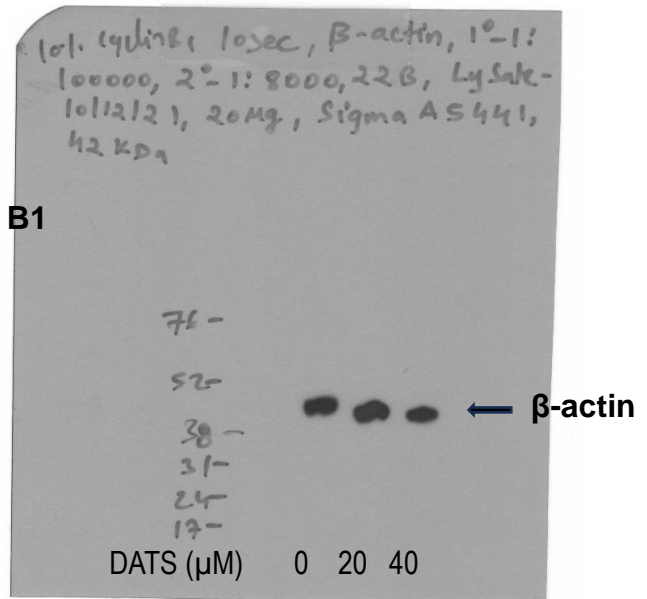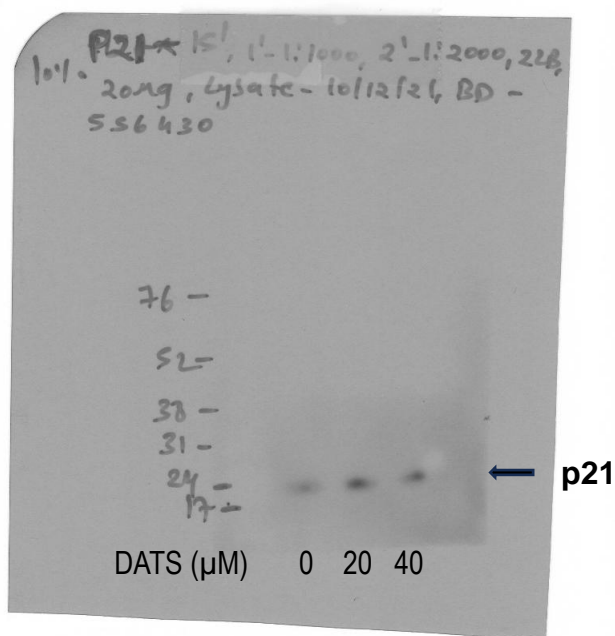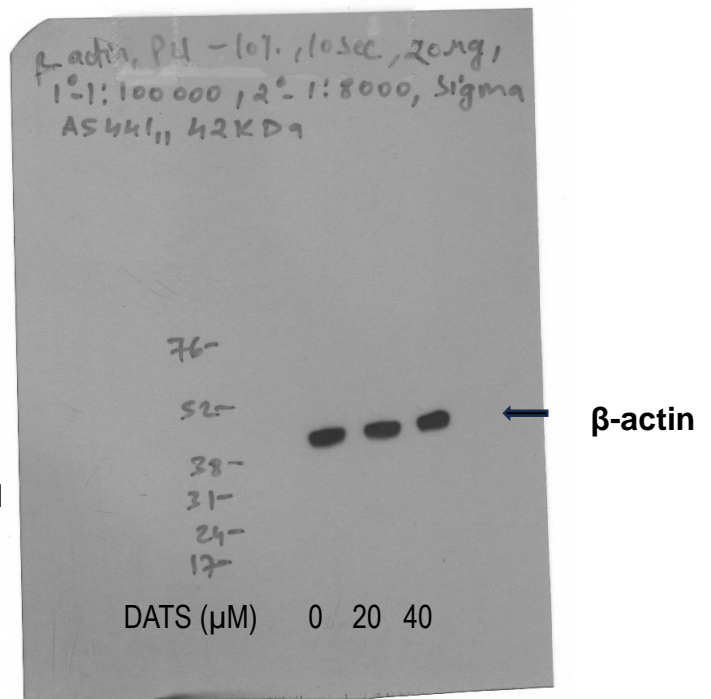

Figure 1I

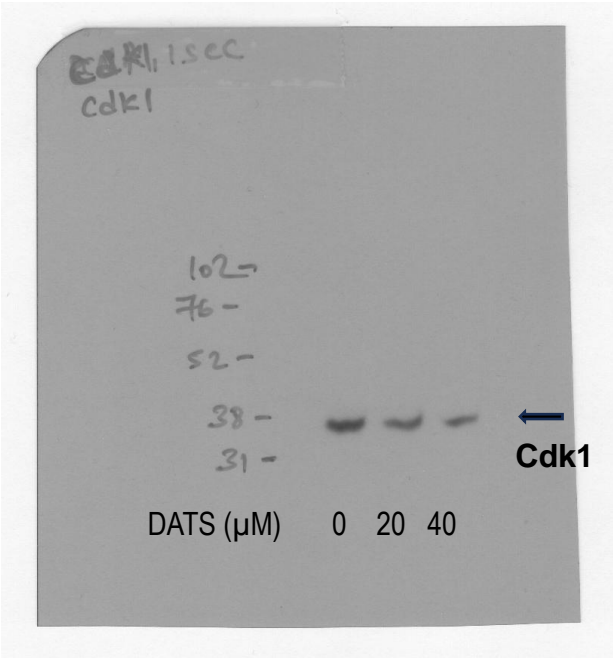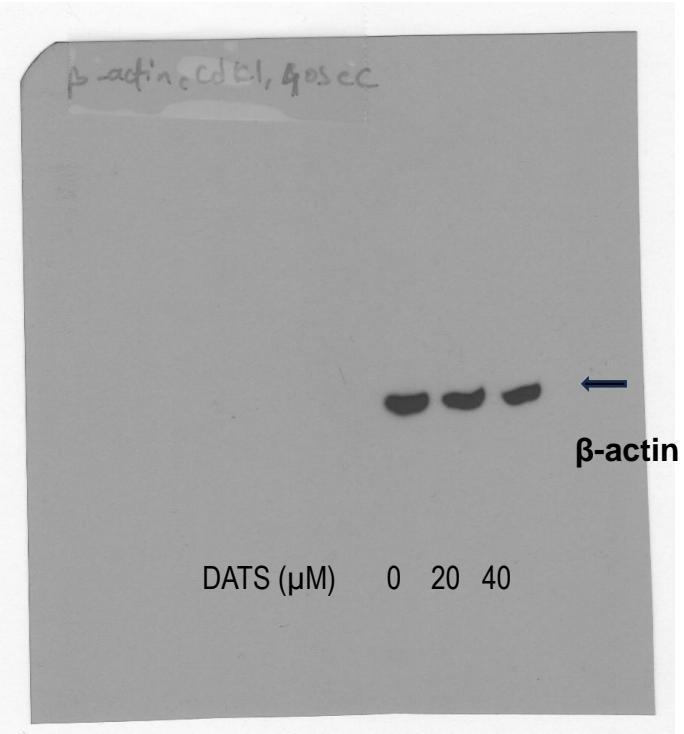

Figure 2K

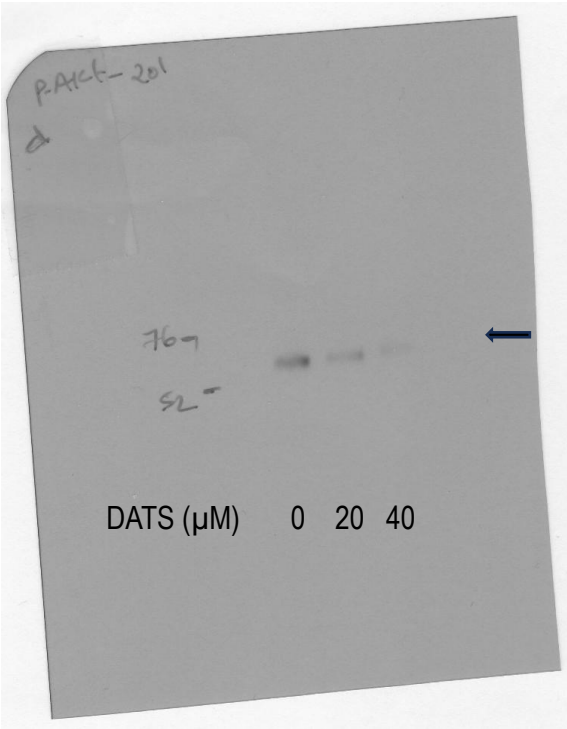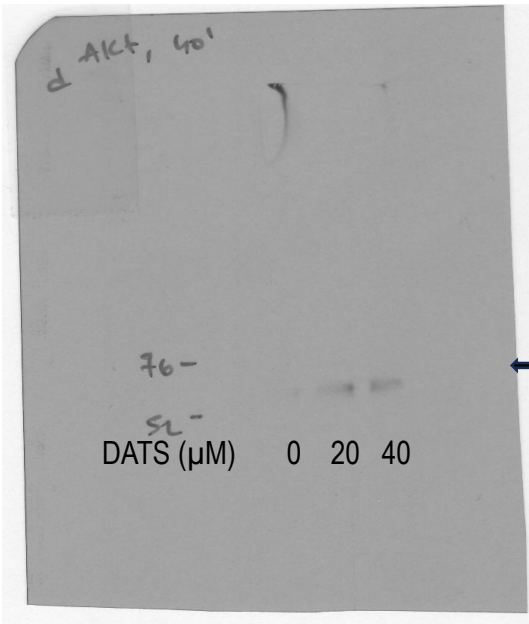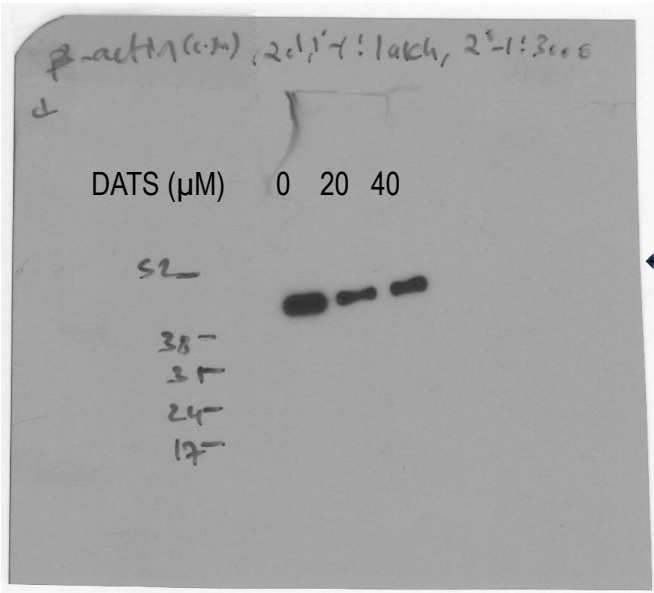

Figure 2K

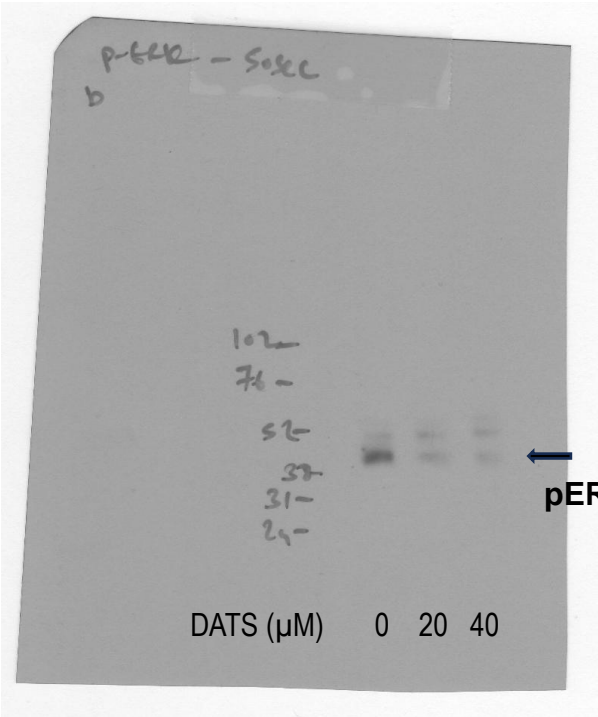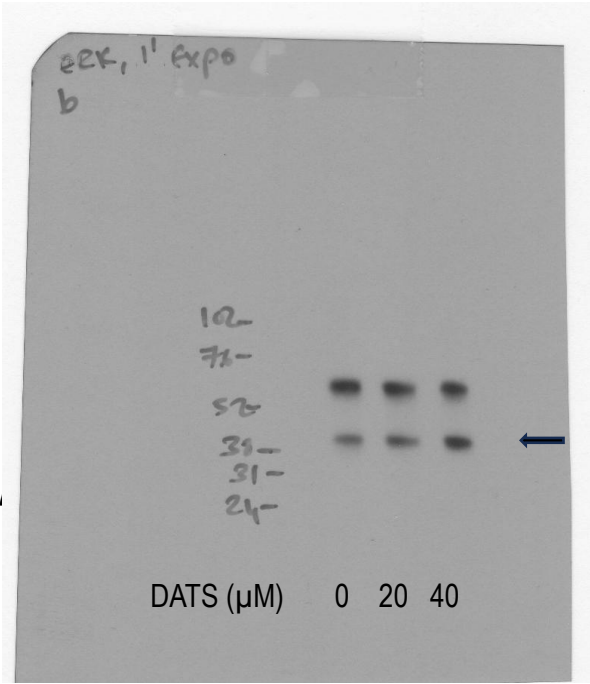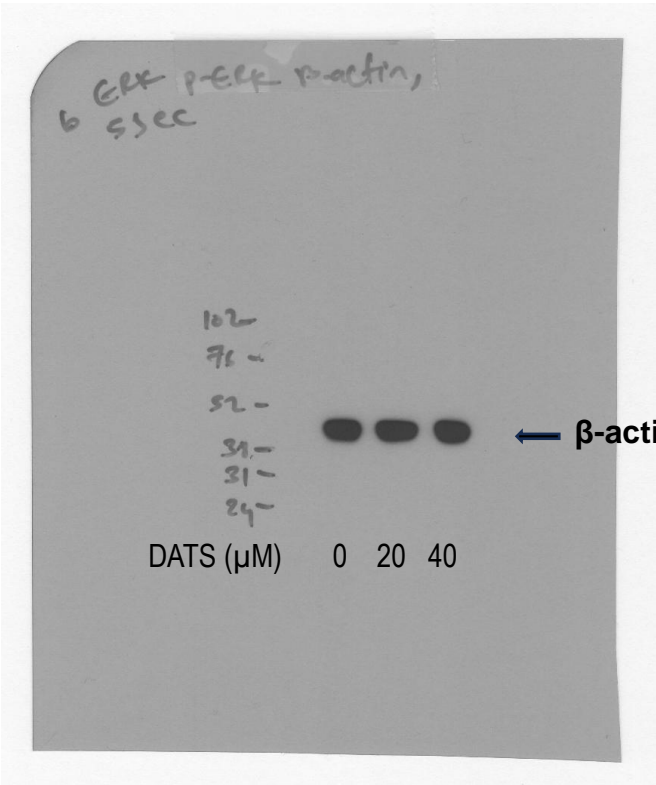

Figure 2K

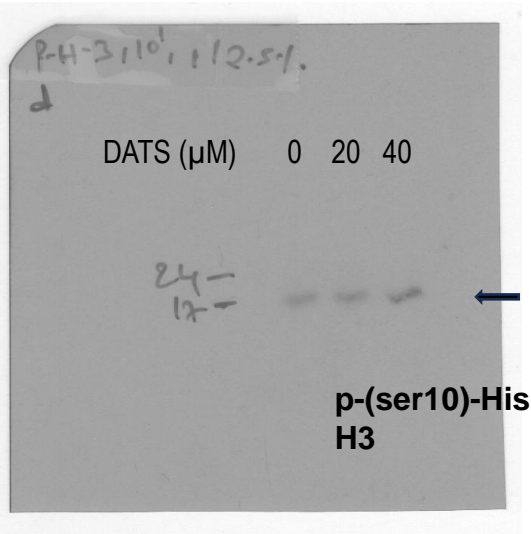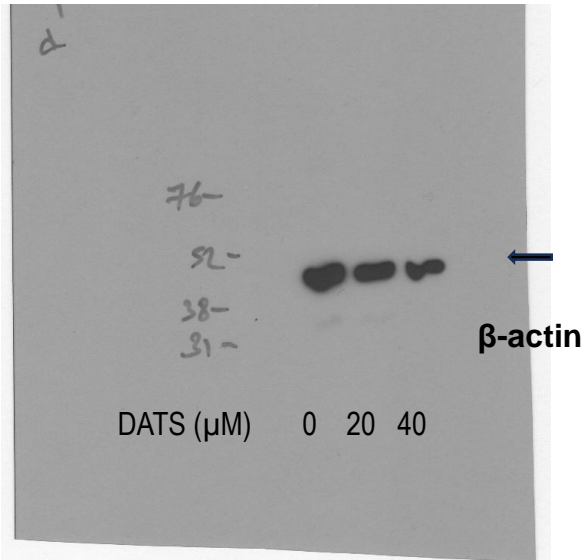

Figure 4E

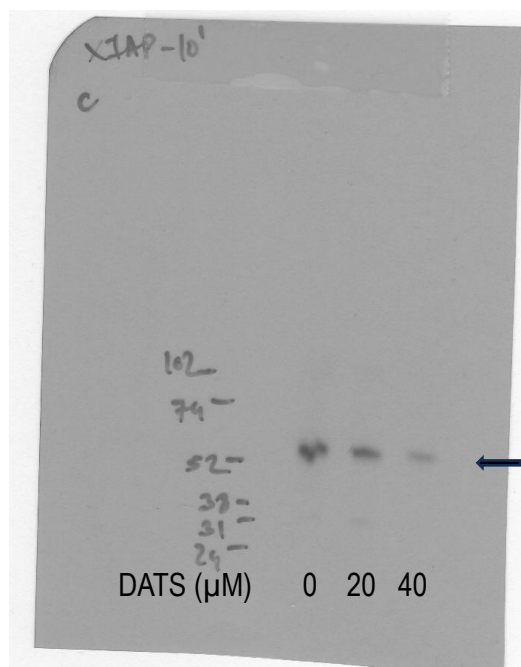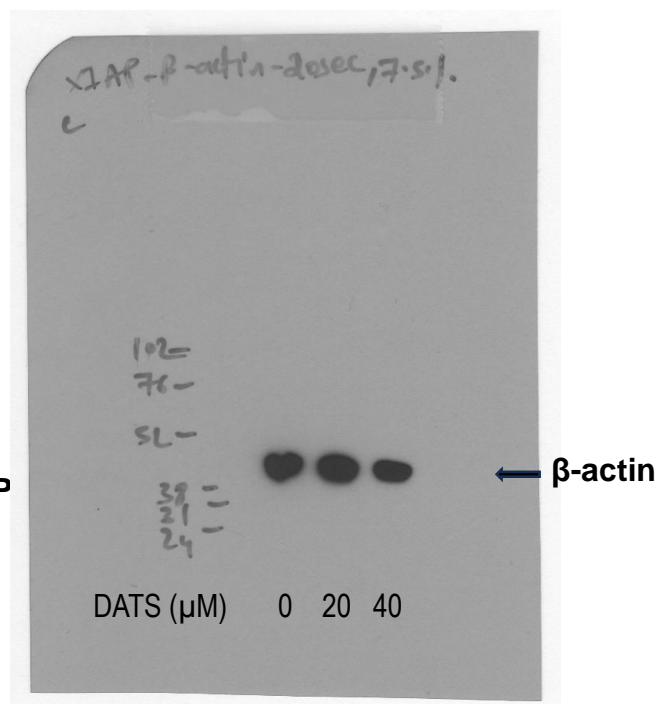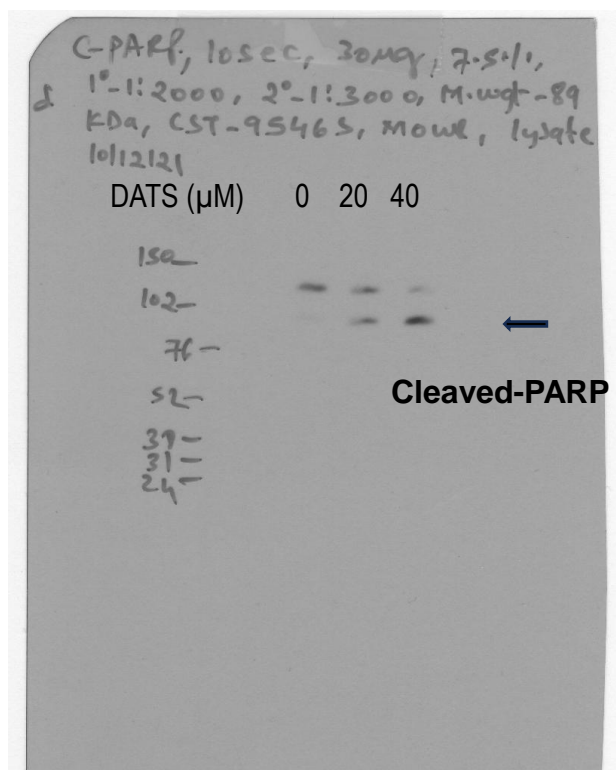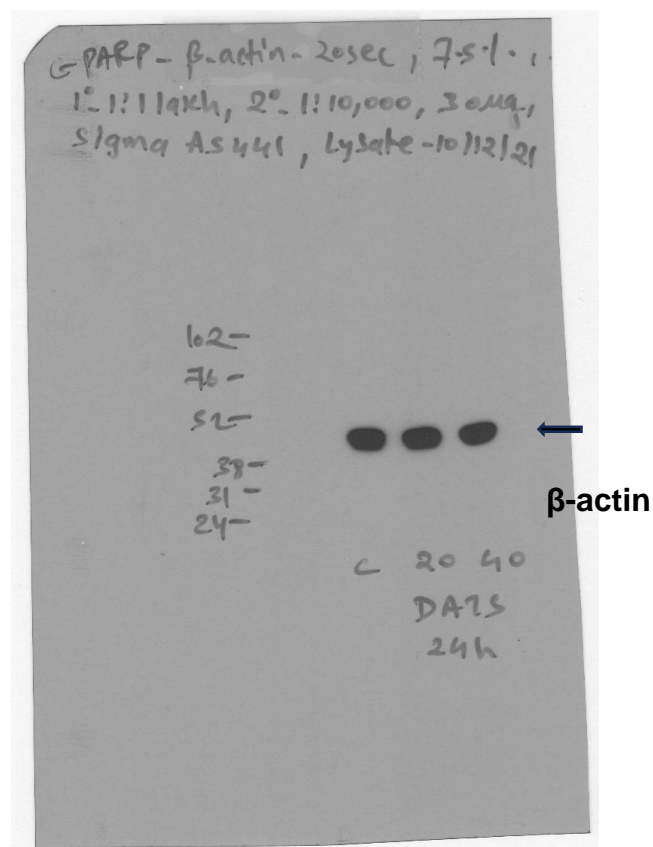

Figure 4E

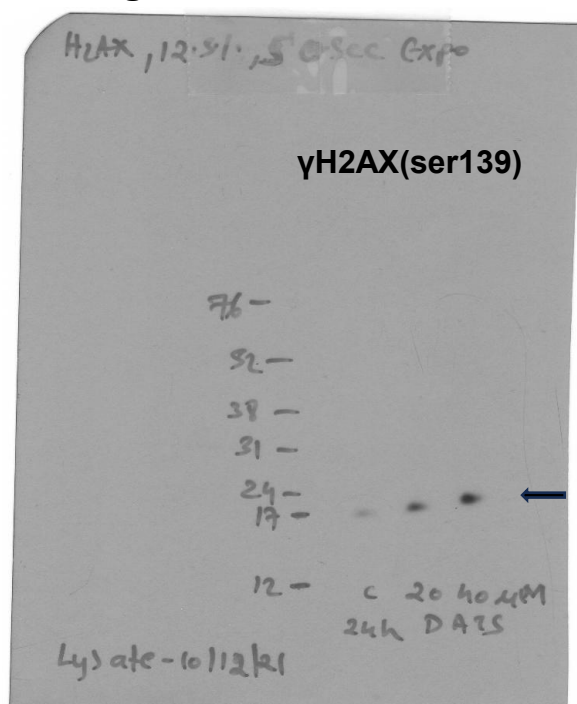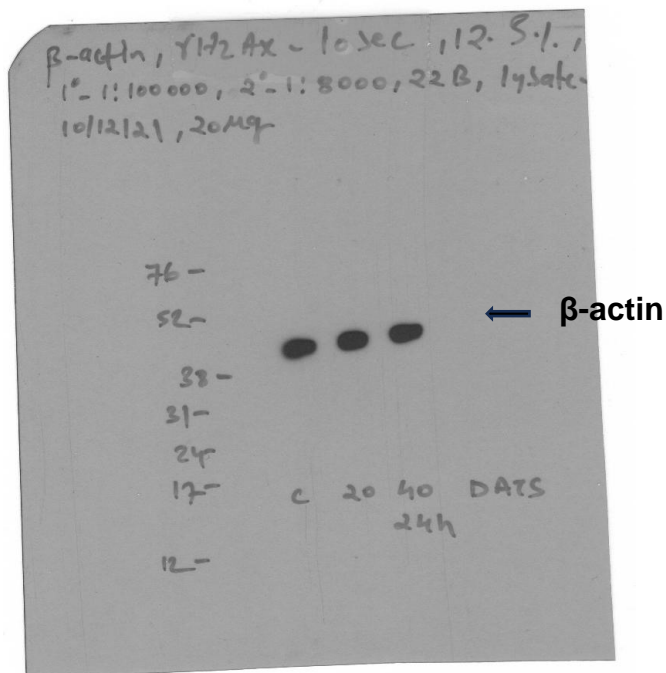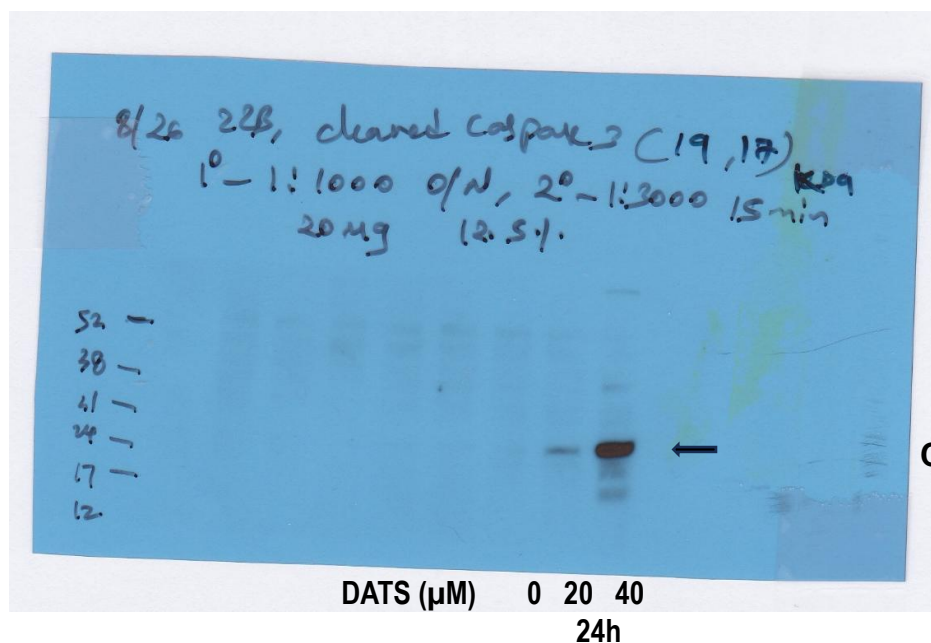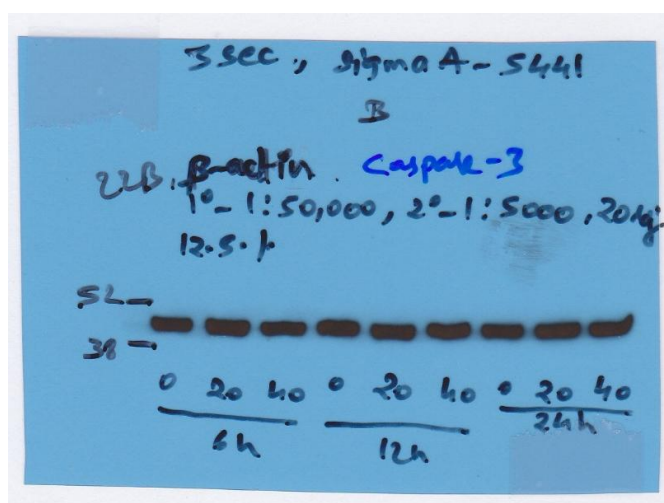

Figure 4F

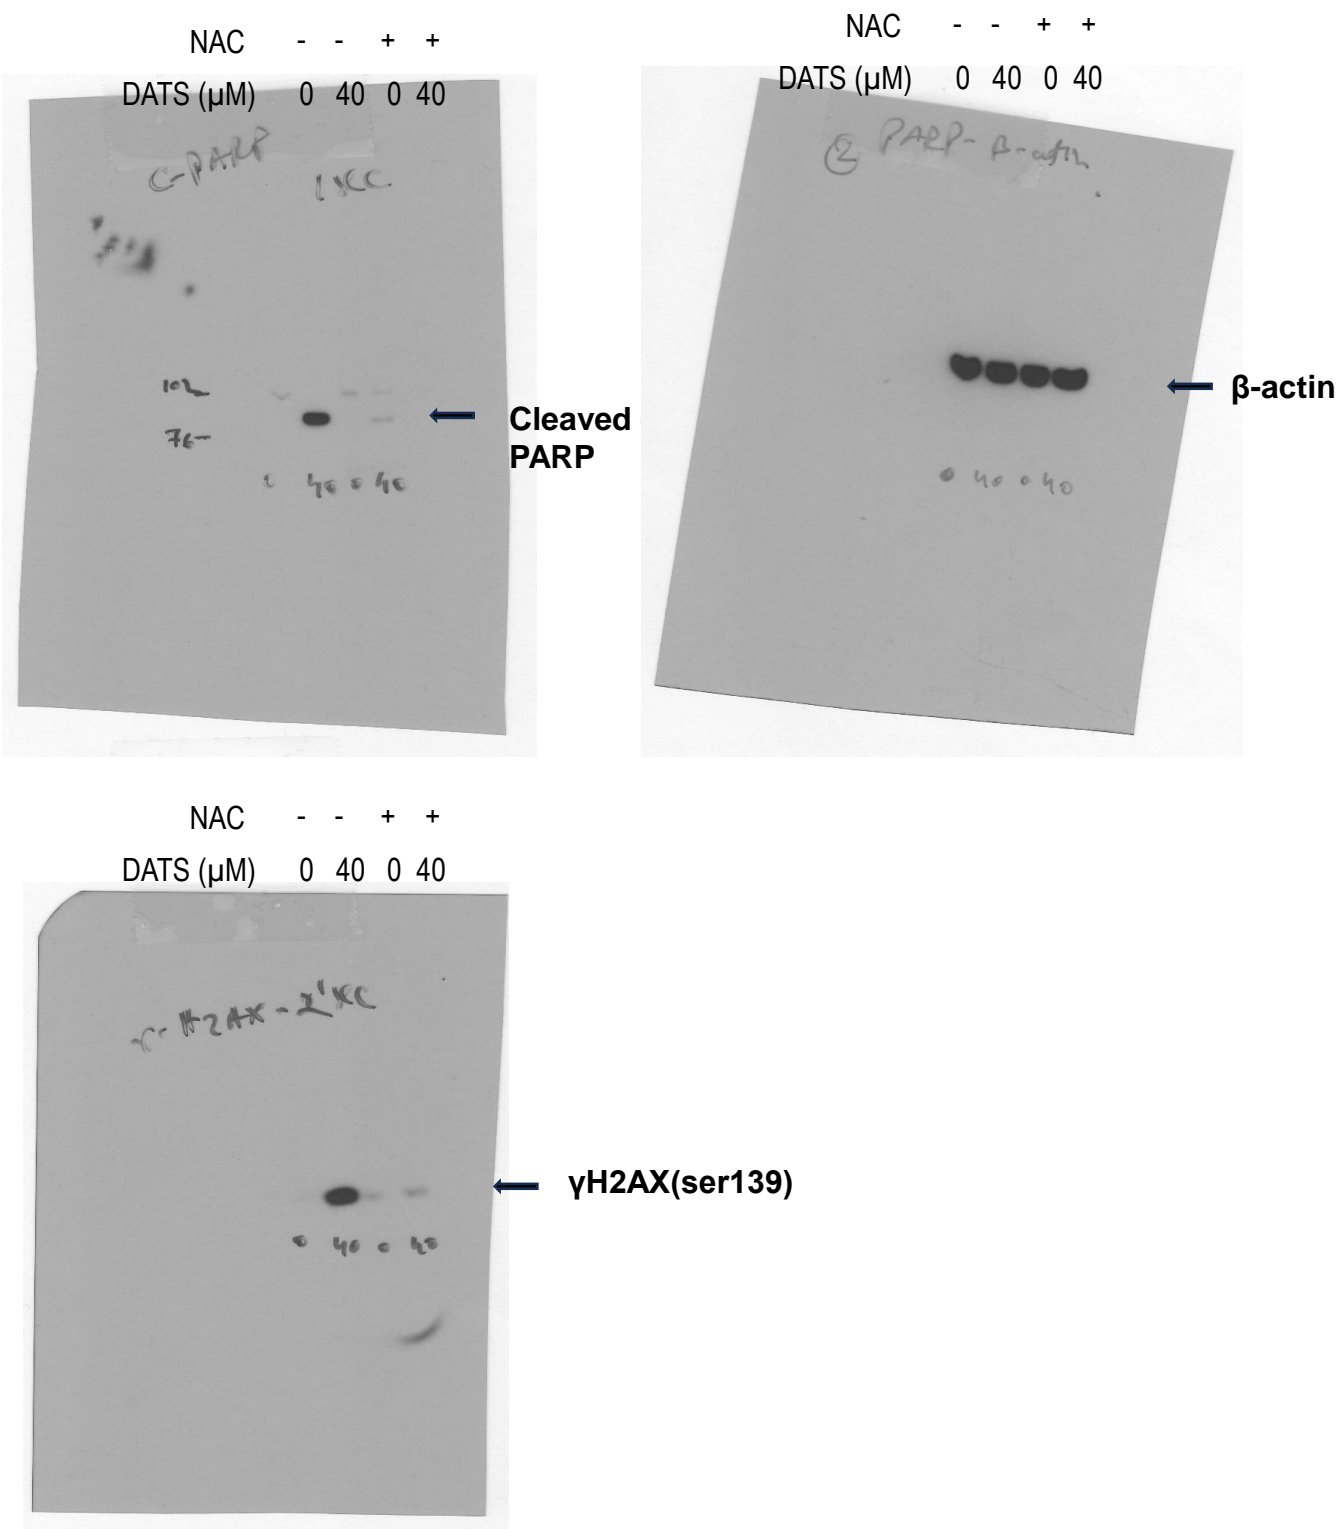

Figure 4F

|                 |   |    |   |    |
|-----------------|---|----|---|----|
| NAC             | - | -  | + | +  |
| DATS ( $\mu$ M) | 0 | 40 | 0 | 40 |

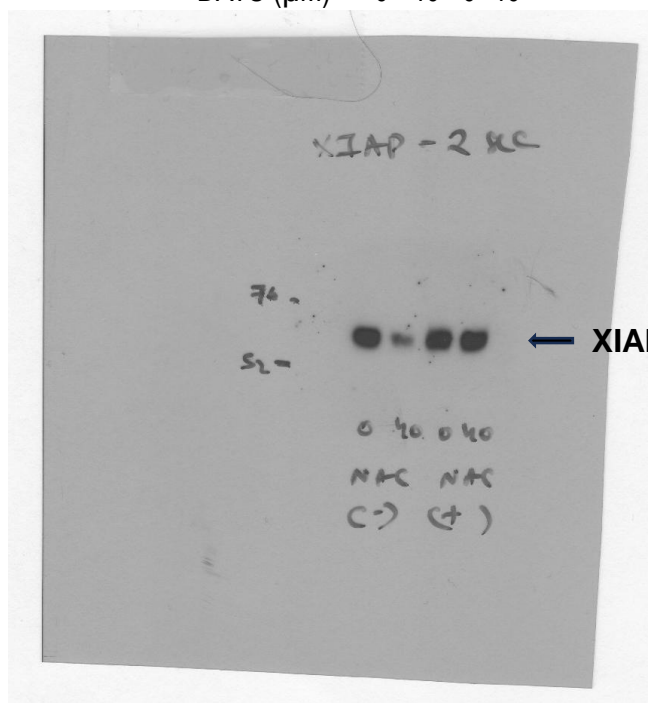

|                 |   |    |   |    |
|-----------------|---|----|---|----|
| NAC             | - | -  | + | +  |
| DATS ( $\mu$ M) | 0 | 40 | 0 | 40 |

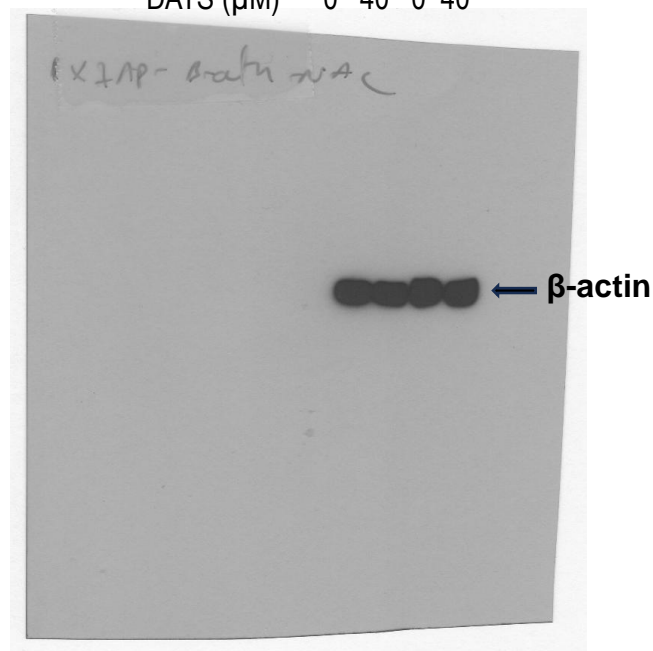

|                 |   |    |   |    |
|-----------------|---|----|---|----|
| NAC             | - | -  | + | +  |
| DATS ( $\mu$ M) | 0 | 40 | 0 | 40 |

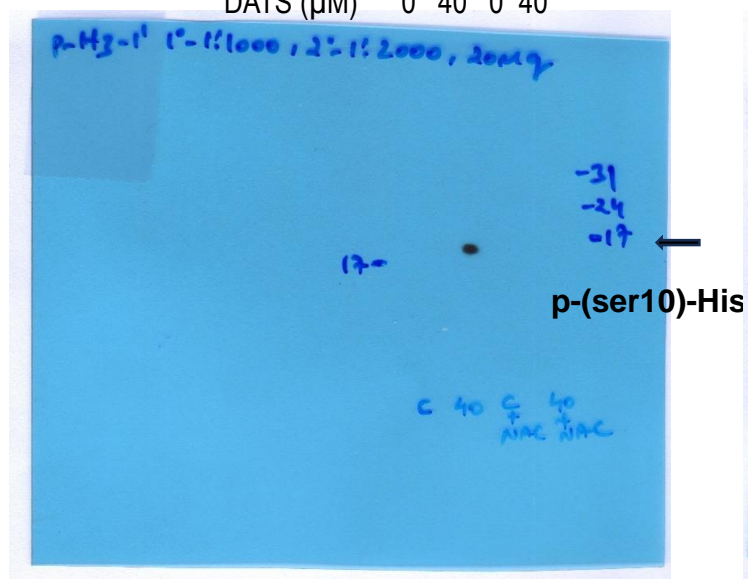

|                 |   |    |   |    |
|-----------------|---|----|---|----|
| NAC             | - | -  | + | +  |
| DATS ( $\mu$ M) | 0 | 40 | 0 | 40 |

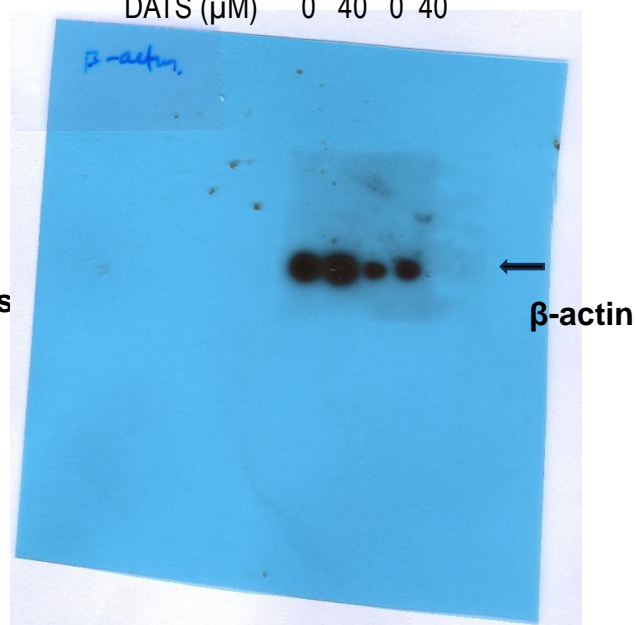

Supplementary Figure S2

Cyclin B1

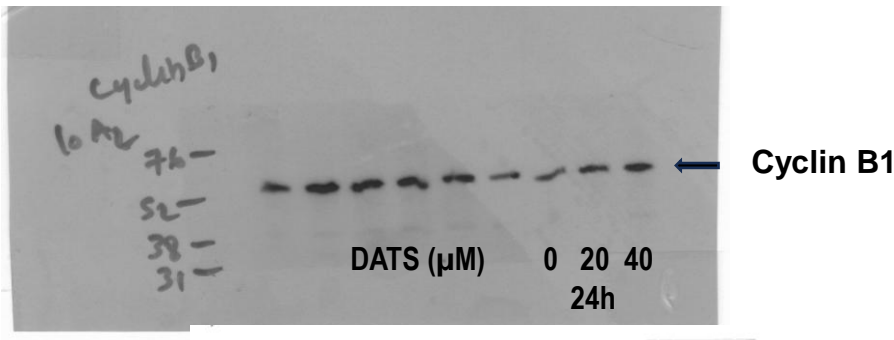

$\beta$ - actin

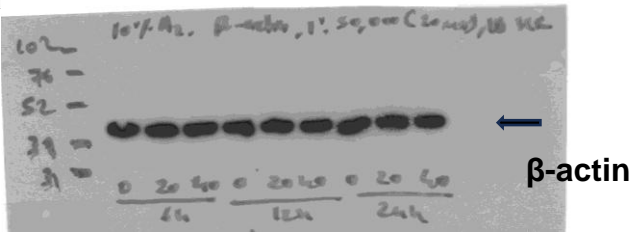

# Supplementary Figure S5

## Cleaved PARP

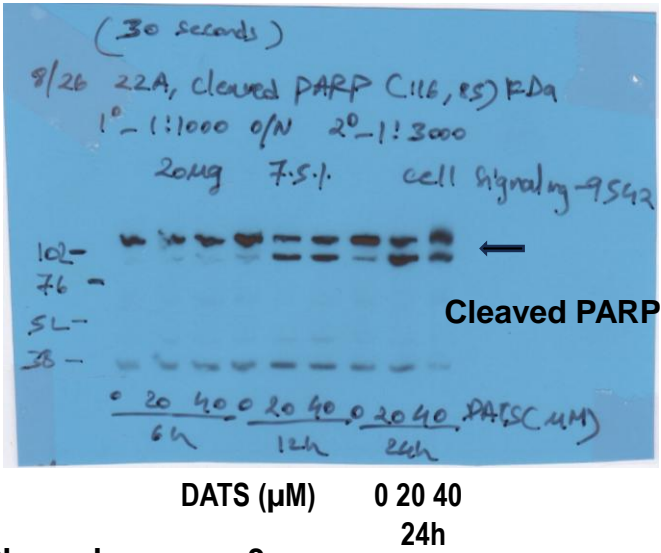

## β- actin

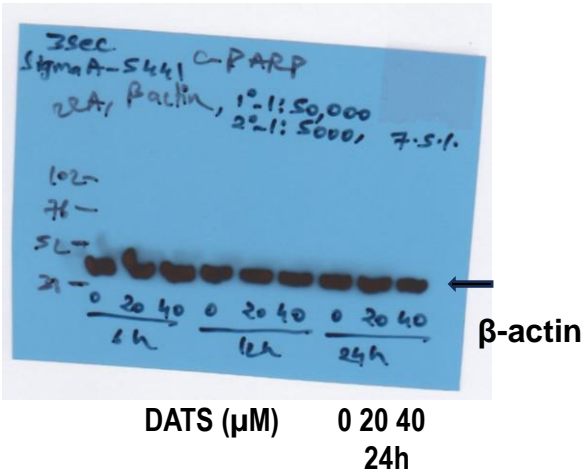

## Cleaved caspase-3

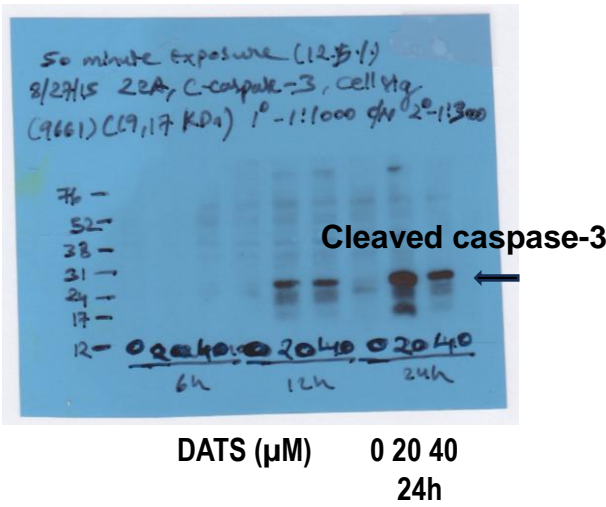

## β- actin

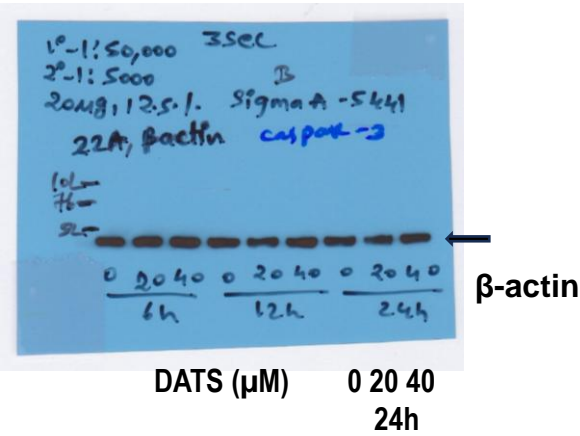

Supplement: s1 [file s1]
