# Supplementary material for: Diallyl Trisulfide Induces ROS-Mediated Mitotic Arrest and Apoptosis and Inhibits HNSCC Tumor Growth and Cancer Stemness
Source: MDPI journal article supplement (doi:10.3390/cancers16020378), 2024-01-16
Supplement: s1 [file s1]

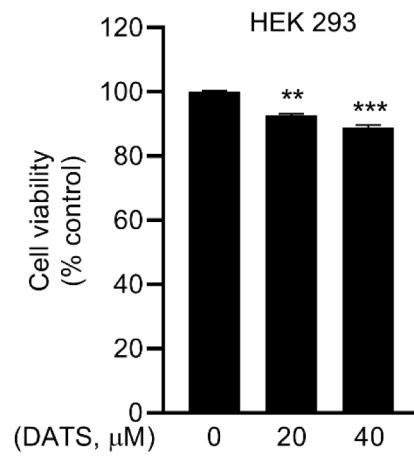

**Supplementary Figure S1. DATS treatment moderately inhibited cell viability in HEK 293 cells.** Cells were treated with vehicle (DMSO) alone or 20-40  $\mu\text{M}$  of DATS in a fresh medium. After 24 h of these treatments, viable cells were counted using trypan blue staining and hemocytometer. \*\* $p < 0.01$ , \*\*\* $p < 0.001$

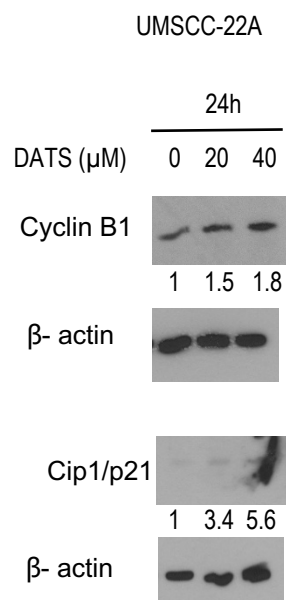

**Supplementary Figure S2: DATS treatment altered cell cycle regulatory proteins in HNSCC cells.** Western blotting for cell cycle proteins using lysate from UMSCC-22A cells treated with DMSO control and DATS (20 and 40  $\mu$ M) for 24h. Number below each band represents the densitometric data of fold change to that of control.

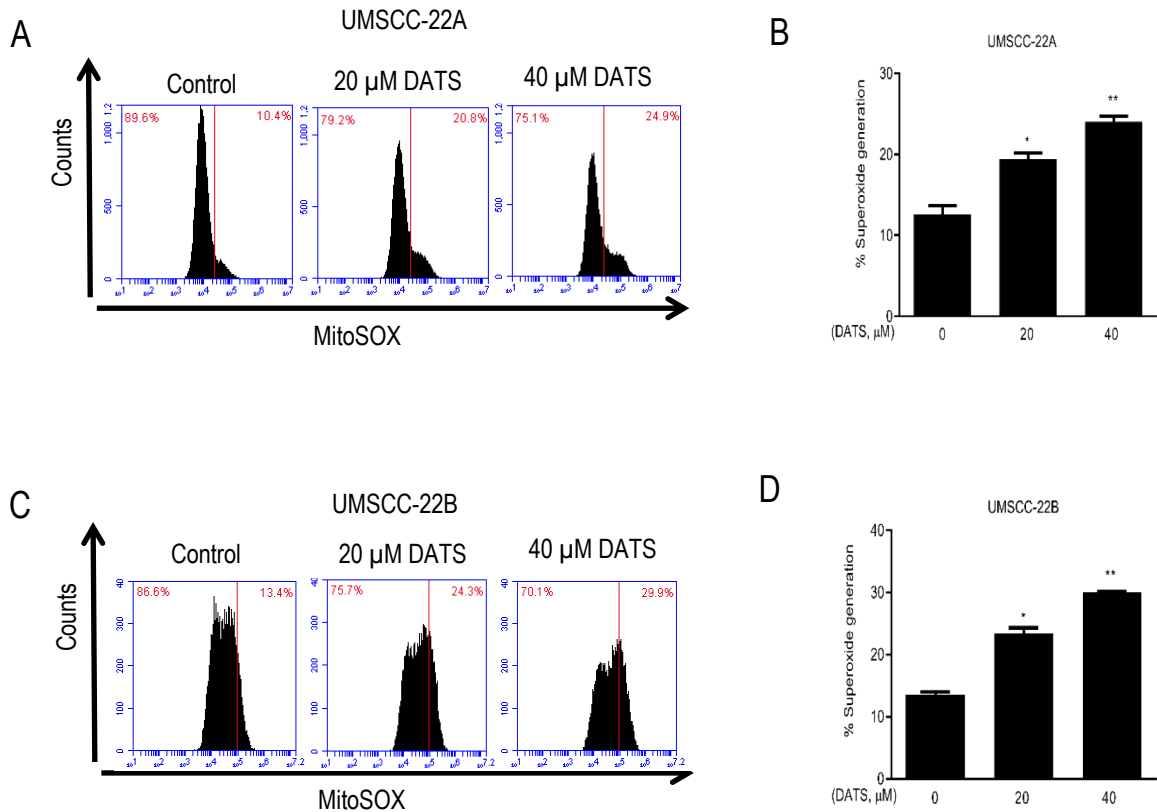

**Supplementary Figure S3. DATS treatment caused ROS generation in HNSCC cells.** Representative histograms of (A) UMSSC-22A and (C) UMSSC-22B cells treated with different doses of DATS (20, 40 $\mu$ M) for 3h and analyzed by flow cytometry for MitoSOX Red fluorescence in HNSCC cells. DATS treatment caused superoxide generation in HNSCC cells and quantitation of superoxide generation in (B) UMSSC-22A and (D) UMSSC-22B cells compared to DMSO control. \* $p < 0.05$ , \*\* $p < 0.01$ .

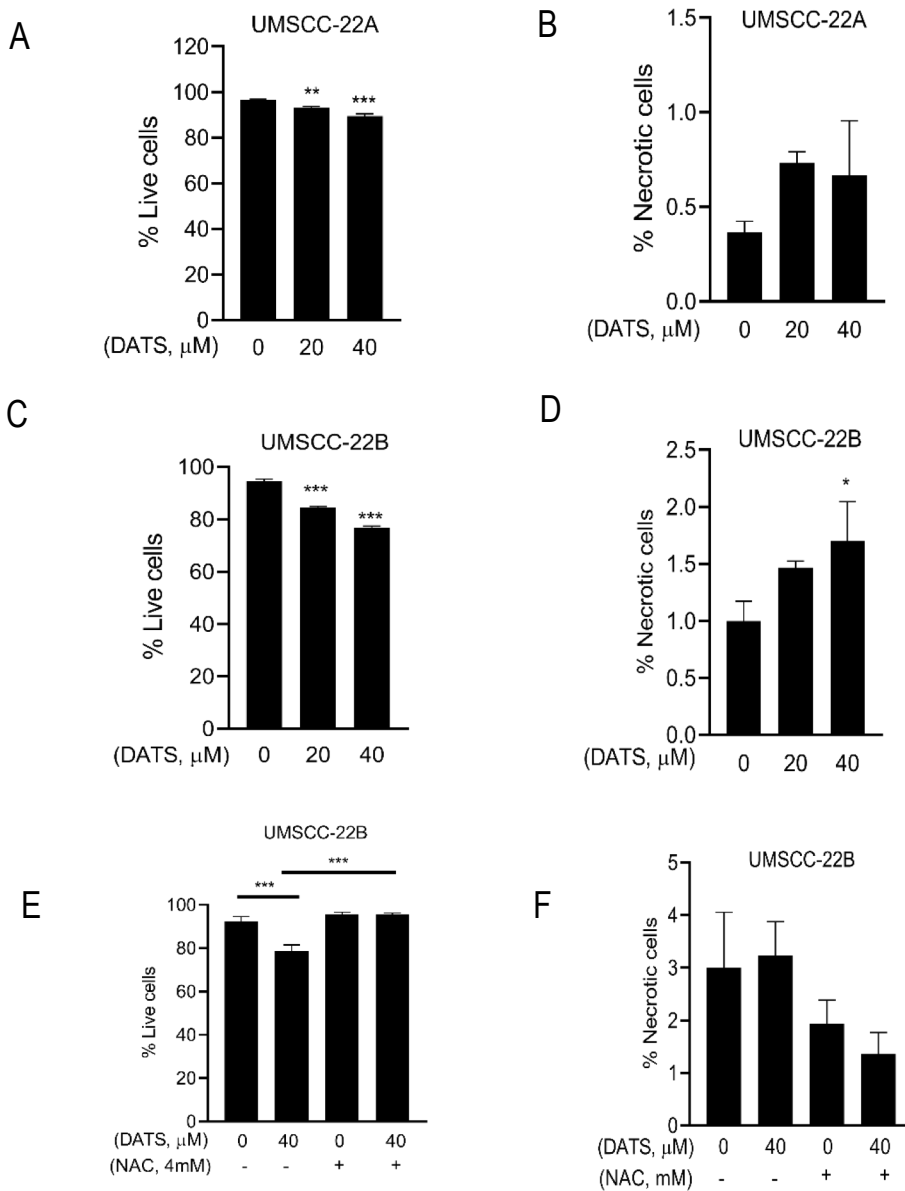

**Supplementary Figure S4. DATS induced apoptotic cell death in HNSCC cells:** UMSSC-22A and UMSSC-22B cells treated with DMSO (control) or 20  $\mu\text{M}$  and 40  $\mu\text{M}$  DATS for 24h. Quantitative data of (A) percent live and (B) percent necrotic cells of UMSSC-22A cells. Quantitative data of (C) percent live and (D) percent necrotic cells of UMSSC-22B cells. Quantitative data of (E) percent live and (F) percent necrotic cells of UMSSC-22B cells treated with DMSO (control) or 40  $\mu\text{M}$  DATS for 24h in the absence or presence of 4 mM NAC (N-acetyl cysteine) pretreatment. \* $p < 0.05$ , \*\* $p < 0.01$ , \*\*\* $p < 0.001$

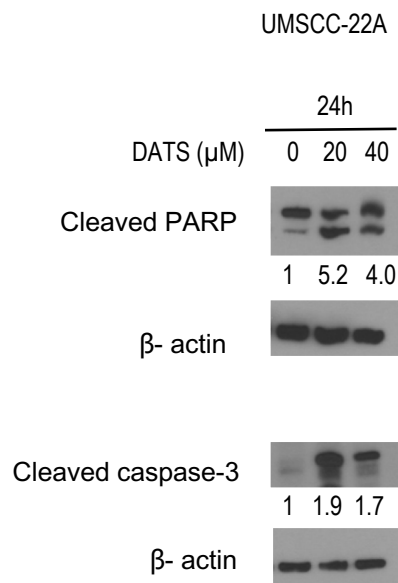

**Supplementary Figure S5: DATS treatment altered apoptotic regulatory proteins in HNSCC cells.** Western blotting for apoptotic regulatory proteins using lysate from UMSCC-22A cells treated with DMSO control and DATS (20 and 40  $\mu$ M) for 24h. Number below each band represents the densitometric data of fold change to that of control.
